# Supplementary material for: A Microbiomic Analysis in African Americans with Colonic Lesions Reveals Streptococcus sp.VT162 as a Marker of Neoplastic Transformation
Source: PubMed Central journal article supplement (PMC5704227; doi:10.3390/genes8110314), 2017-11-09
Supplement: genes-08-00314-s001.pdf [file genes-08-00314-s001.pdf]

**SUPPLEMENTARY TABLES:**

Suppl. Table 1: Bins and library matched metabolites that distinguished adenoma patients from healthy subjects. The bin value is the center of the bin region. Directionality is based on the loadings plot in the PLS-DA (increased means that the bin/ metabolite is increased (highly represented) in the adenoma group when compared to the healthy controls.

| Bin  | Metabolite                  | VIP | Direction | Bin  | Metabolite                    | VIP | Direction |
|------|-----------------------------|-----|-----------|------|-------------------------------|-----|-----------|
| 0.62 | Unknown                     | 1.4 | Increased | 2.22 | Cholate                       | 1.0 | Increased |
| 0.86 | Caprate, Valerate           | 1.5 | Increased | 2.34 | Glutamate                     | 1.0 | Increased |
| 0.90 | Isovalerate                 | 2.1 | Increased | 2.54 | Unknown                       | 1.6 | Increased |
| 0.94 | Leucine, Isoleucine         | 1.8 | Decreased | 2.90 | Unknown                       | 1.6 | Increased |
| 0.98 | Valine                      | 1.3 | Decreased | 3.02 | Lysine                        | 1.2 | Decreased |
| 1.02 | Valine                      | 1.4 | Decreased | 3.10 | Phenylalanine,<br>Unknown     | 1.5 | Increased |
| 1.06 | Propionate                  | 1.5 | Increased | 3.14 | Unknown                       | 1.6 | Increased |
| 1.14 | Lipids, fatty acids         | 1.7 | Decreased | 3.22 | Glucose, O-<br>Phosphocholine | 3.5 | Increased |
| 1.18 | Isopropanol, fatty<br>acids | 1.5 | Decreased | 3.26 | Phenylalanine,<br>Unknown     | 2.3 | Decreased |
| 1.30 | Lactate, Threonine          | 1.0 | Increased | 3.54 | Glycine, Glycerol             | 1.3 | Decreased |
| 1.46 | Alanine, Unknown            | 1.6 | Increased | 3.58 | Valine, Threonine             | 1.2 | Decreased |
| 1.54 | Butyrate                    | 1.8 | Increased | 3.62 | Unknown                       | 7.7 | Decreased |
| 1.70 | Leucine                     | 1.1 | Increased | 3.66 | Unknown, Isoleucine           | 5.8 | Decreased |
| 1.74 | Leucine                     | 1.4 | Increased | 3.70 | Unknown                       | 3.7 | Decreased |
| 1.78 | Unknown                     | 1.0 | Increased | 3.74 | Lysine, Isoleucine            | 1.2 | Decreased |
| 1.90 | Acetate                     | 3.4 | Increased | 3.78 | Glycerol                      | 1.3 | Decreased |
| 2.14 | Butyrate                    | 1.9 | Increased | 3.82 | Glucose                       | 1.3 | Decreased |
| 2.18 | Propionate                  | 1.5 | Increased | 4.02 | Fatty acids                   | 1.1 | Decreased |

**Suuppl. Table 2: Summary of metagenomic data for all analyzed samples: a) Cancers and matched Normals, b) Adenomas and Healthy subjects' stool samples.**

**a)**

| Sample#CC | Location | Age | gender | Age categories | MG-RAST ID | Total read base-pairs | Total number of reads | Number of reads after de-replication | Number of reads not mapped to human genome | Number of de-novo assembled genes | Number of reads mapped to the Combined Gene Catalog |
|-----------|----------|-----|--------|----------------|------------|-----------------------|-----------------------|--------------------------------------|--------------------------------------------|-----------------------------------|-----------------------------------------------------|
| 1024N     | Right    | 73  | F      | >60            | 4537962    | 1,644,581,250         | 10,666,848            | 7,152,563                            | 3,257,902                                  | 26,554                            | 189,655                                             |
| 1024T     | Right    | 73  | F      | >60            | 4537963    | 533,190,597           | 2,343,778             | 1,972,888                            | 1,389,222                                  | 13,613                            | 2,482                                               |
| 1028N     | Left     | 42  | M      | <=50           | 4537964    | 1,753,759,640         | 10,579,432            | 7,994,209                            | 4,985,633                                  | 31,235                            | 159,828                                             |
| 1028T     | Left     | 42  | M      | <=50           | 4537965    | 1,827,358,119         | 11,166,023            | 8,504,150                            | 4,912,783                                  | 28,176                            | 76,387                                              |
| 1029N     | Right    | 51  | F      | <=60           | 4537966    | 2,212,344,601         | 13,596,567            | 11,091,440                           | 6,716,519                                  | 30,661                            | 137,705                                             |
| 1029T     | Right    | 51  | F      | <=60           | 4537967    | 1,842,141,313         | 11,096,026            | 7,331,429                            | 4,474,683                                  | 64,339                            | 104,300                                             |
| 1038N     | Left     | 54  | M      | <=60           | 4537968    | 1,878,748,442         | 11,413,547            | 9,123,450                            | 5,323,645                                  | 26,838                            | 62,772                                              |
| 1038T     | Left     | 54  | M      | <=60           | 4537969    | 1,867,594,574         | 11,329,181            | 8,990,793                            | 5,528,961                                  | 35,263                            | 79,057                                              |
| 1053N     | Right    | 50  | F      | <=50           | 4537970    | 2,016,157,252         | 12,756,861            | 9,929,123                            | 6,028,666                                  | 14,410                            | 97,227                                              |
| 1053T     | Right    | 50  | F      | <=50           | 4537971    | 1,831,866,894         | 11,318,160            | 9,561,945                            | 5,500,359                                  | 16,638                            | 55,088                                              |
| 1054N     | Right    | 53  | M      | <=60           | 4537972    | 2,203,954,960         | 13,565,337            | 13,165,786                           | 1,956,110                                  | 391                               | 26,906                                              |
| 1054T     | Right    | 53  | M      | <=60           | 4537973    | 2,188,956,703         | 13,206,838            | 9,283,259                            | 5,500,271                                  | 61,272                            | 107,598                                             |
| 1057N     | Left     | 88  | M      | >60            | 4537974    | 1,793,513,844         | 10,896,395            | 8,653,023                            | 4,888,216                                  | 22,891                            | 121,339                                             |
| 1057T     | Left     | 88  | M      | >60            | 4537975    | 2,318,458,337         | 15,845,692            | 10,974,275                           | 6,720,687                                  | 26,004                            | 91,866                                              |
| 1059N     | Right    | 60  | F      | <=60           | 4537976    | 2,025,344,413         | 12,358,271            | 9,833,739                            | 5,320,384                                  | 33,359                            | 78,236                                              |
| 1059T     | Right    | 60  | F      | <=60           | 4537977    | 1,994,857,882         | 12,004,025            | 9,244,806                            | 5,562,342                                  | 41,042                            | 78,848                                              |
| 1060N     | Left     | 53  | F      | <=60           | 4537978    | 2,256,852,278         | 13,603,661            | 10,288,812                           | 6,197,098                                  | 60,460                            | 202,474                                             |
| 1060T     | Left     | 53  | F      | <=60           | 4537979    | 1,976,386,826         | 12,238,973            | 9,951,700                            | 5,115,576                                  | 21,693                            | 65,643                                              |
| 1065N     | Left     | 41  | M      | <=50           | 4537980    | 2,025,558,322         | 12,369,232            | 11,901,313                           | 1,686,804                                  | 2,063                             | 25,249                                              |
| 1065T     | Left     | 41  | M      | <=50           | 4537981    | 2,652,460,630         | 15,965,647            | 11,367,671                           | 7,113,107                                  | 82,025                            | 122,378                                             |

**b)**

| sample CC# | Age | Gender | Location categories | Diagnosis | Total read base-pairs | Total number of reads | Number of reads after de-replication | Number of reads not mapped to human genome | Number of de-novo assembled genes | Number of reads mapped to the Combined Gene Catalog |
|------------|-----|--------|---------------------|-----------|-----------------------|-----------------------|--------------------------------------|--------------------------------------------|-----------------------------------|-----------------------------------------------------|
| CC0839     | 64  | M      | Right               | Adenoma   | 727,169,344           | 4,414,873             | 4,047,242                            | 4,046,313                                  | 52,828                            | 1,401,974                                           |
| CC0872     | 81  | F      | Right               | Adenoma   | 294,228,737           | 1,806,268             | 1,586,477                            | 1,586,103                                  | 10,755                            | 546,277                                             |
| CC0883     | 71  | M      | Left                | Adenoma   | 315,809,466           | 1,941,435             | 1,755,506                            | 1,754,900                                  | 22,618                            | 584,649                                             |
| CC0885     | 57  | F      | Right               | Adenoma   | 278,928,798           | 1,808,625             | 1,616,635                            | 1,615,619                                  | 17,491                            | 329,503                                             |
| CC0899     | 56  | M      | Right               | Adenoma   | 14,751,107            | 229,185               | 119,562                              | 119,337                                    | 8                                 | 55,206                                              |
| CC0901     | 53  | F      | Left                | Adenoma   | 635,650,860           | 4,107,892             | 2,690,406                            | 2,688,671                                  | 8,073                             | 1,069,009                                           |
| CC0911     | 53  | F      | Left                | Adenoma   | 587,523,210           | 3,621,581             | 3,334,484                            | 3,333,562                                  | 40,755                            | 1,539,671                                           |
| CC0944     | 53  | M      | Right               | Adenoma   | 627,105,499           | 3,868,823             | 3,347,785                            | 3,347,097                                  | 40,548                            | 1,786,970                                           |
| CC0995     | 59  | F      | Right               | Adenoma   | 445,737,297           | 2,741,790             | 2,508,848                            | 2,508,654                                  | 29,133                            | 1,143,429                                           |
| CC0904     | 82  | F      | Left                | Adenoma   | 550,743,973           | 3,457,852             | 2,963,171                            | 2,961,799                                  | 30,207                            | 1,041,125                                           |
| CC0868     | 54  | F      | none                | Normal    | 396,371,168           | 2,439,250             | 2,199,010                            | 2,196,432                                  | 34,296                            | 1,116,424                                           |
| CC0890     | 71  | F      | none                | Normal    | 313,375,574           | 1,921,863             | 1,789,807                            | 1,789,775                                  | 12,241                            | 827,443                                             |
| CC0895     | 54  | F      | none                | Normal    | 482,477,547           | 2,944,792             | 2,385,845                            | 2,385,670                                  | 29,001                            | 858,679                                             |
| CC0908     | 64  | F      | none                | Normal    | 283,650,684           | 1,704,845             | 1,455,741                            | 1,454,499                                  | 19,109                            | 463,351                                             |
| CC0914     | 59  | M      | none                | Normal    | 452,350,481           | 2,749,271             | 2,498,120                            | 2,495,397                                  | 30,905                            | 1,239,917                                           |
| CC0929     | 59  | F      | none                | Normal    | 376,566,289           | 2,309,525             | 2,121,427                            | 2,120,809                                  | 25,829                            | 494,802                                             |
| CC0961     | 59  | F      | none                | Normal    | 374,300,885           | 2,298,641             | 2,045,454                            | 2,044,955                                  | 19,397                            | 812,180                                             |
| CC0981     | 54  | F      | none                | Normal    | 314,161,995           | 1,946,234             | 1,713,667                            | 1,695,567                                  | 12,410                            | 698,023                                             |
| CC0990     | 58  | M      | none                | Normal    | 693,253,294           | 4,227,227             | 3,597,911                            | 3,597,782                                  | 34,019                            | 1,256,180                                           |
| CC1068     | 73  | M      | none                | Normal    | 443,270,953           | 2,708,846             | 2,566,677                            | 2,566,466                                  | 25,265                            | 1,277,085                                           |
